# Supplementary material for: Visible light initiated hydrothiolation of alkenes and alkynes over ZnIn2S4
Source: Royal Society of Chemistry journal article supplement (doi:10.1039/c9gc00328b), 2019-01-01

**Supporting Information of**  
**Visible Light Initiated Hydrothiolation of Alkenes and Alkynes**  
**over ZnIn<sub>2</sub>S<sub>4</sub>**

*Yuanyuan Li, Jingyu Cai, Mingming Hao, Zhaohui Li\**

*Research Institute of Photocatalysis, State Key Laboratory of Photocatalysis on Energy and Environment, College of Chemistry, Fuzhou University, Fuzhou 350116, P. R. China*

---

\* Author to whom all correspondences should be addressed. E-mail:  
zhaohuili1969@yahoo.com, Tel (Fax): 86-591-22865855

**Fig. S1** NMR spectra of benzyl styryl sulfide.

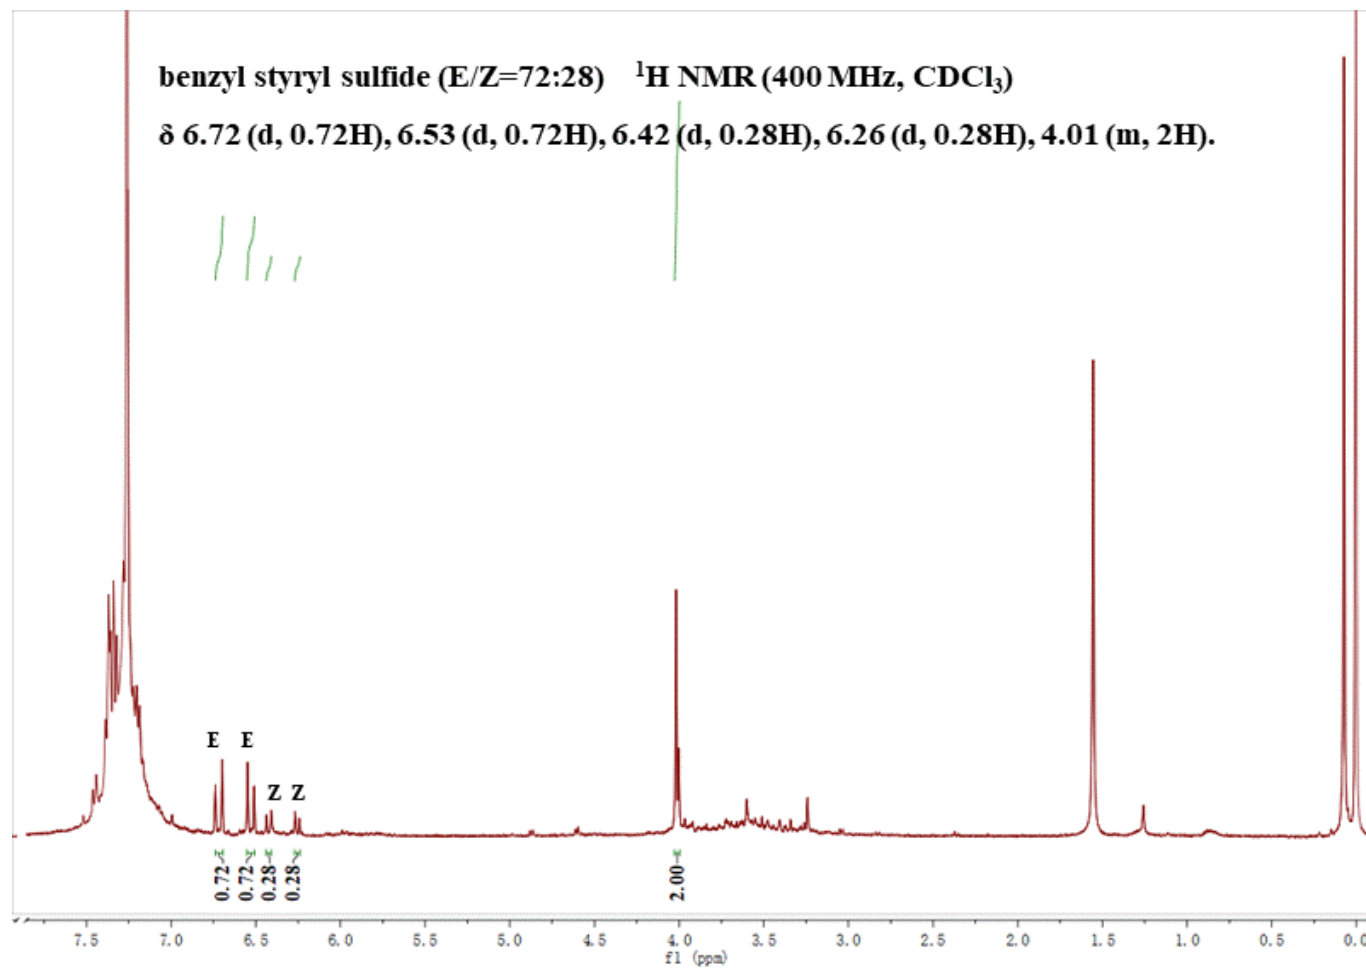

**Fig. S2** NMR spectra of benzyl styryl sulfide after irradiated for another 15h.

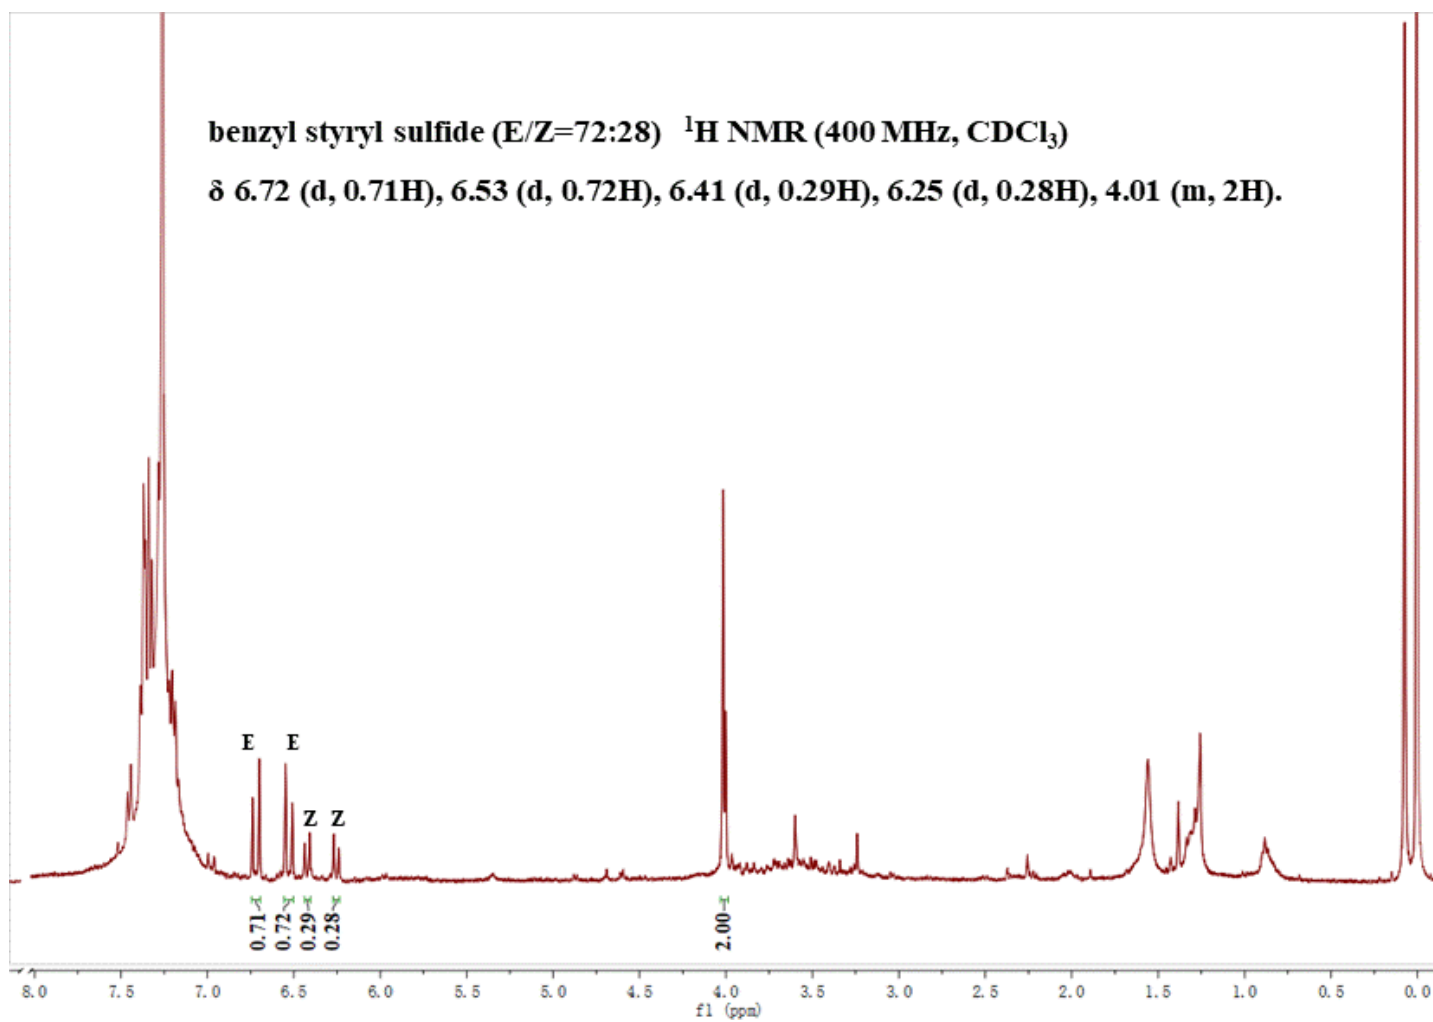

Supplement: c9gc00328b1.pdf [file c9gc00328b1.pdf]
